# Supplementary material for: Heterogeneity in HIV and cellular transcription profiles in cell line models of latent and productive infection: implications for HIV latency
Source: PubMed Central journal article supplement (PMC6849327; doi:10.1186/s12977-019-0494-x), 2019-11-11

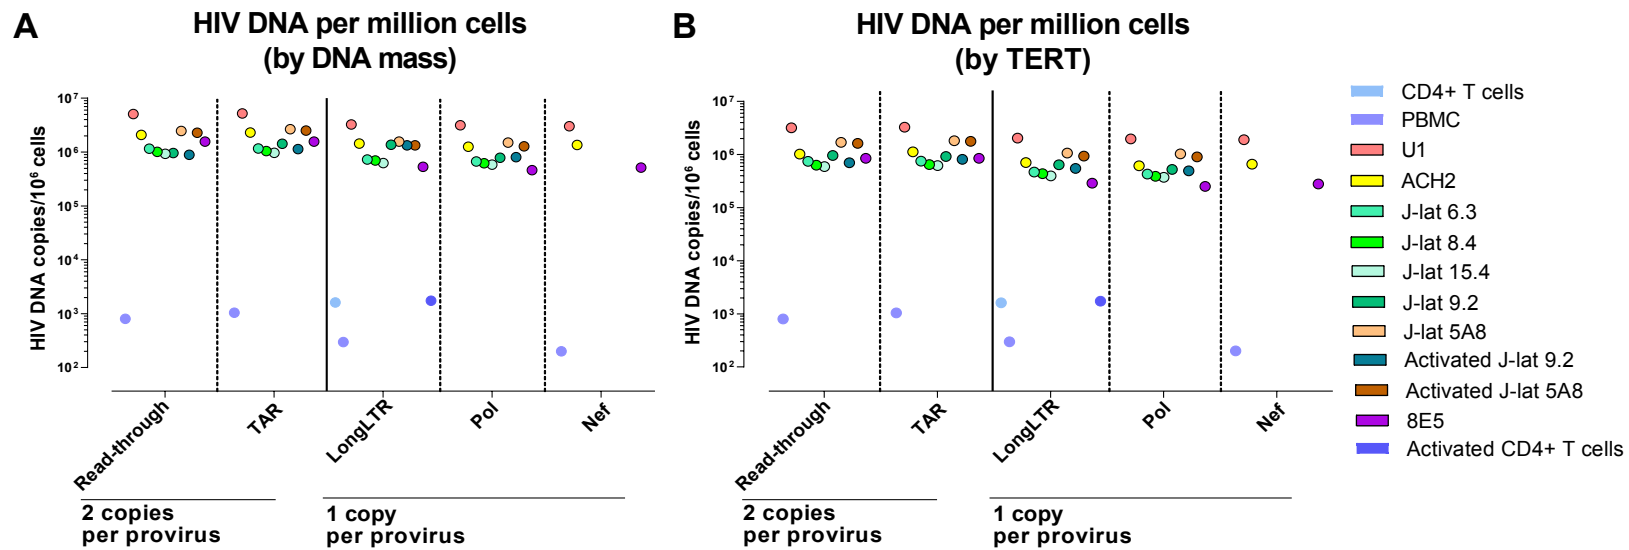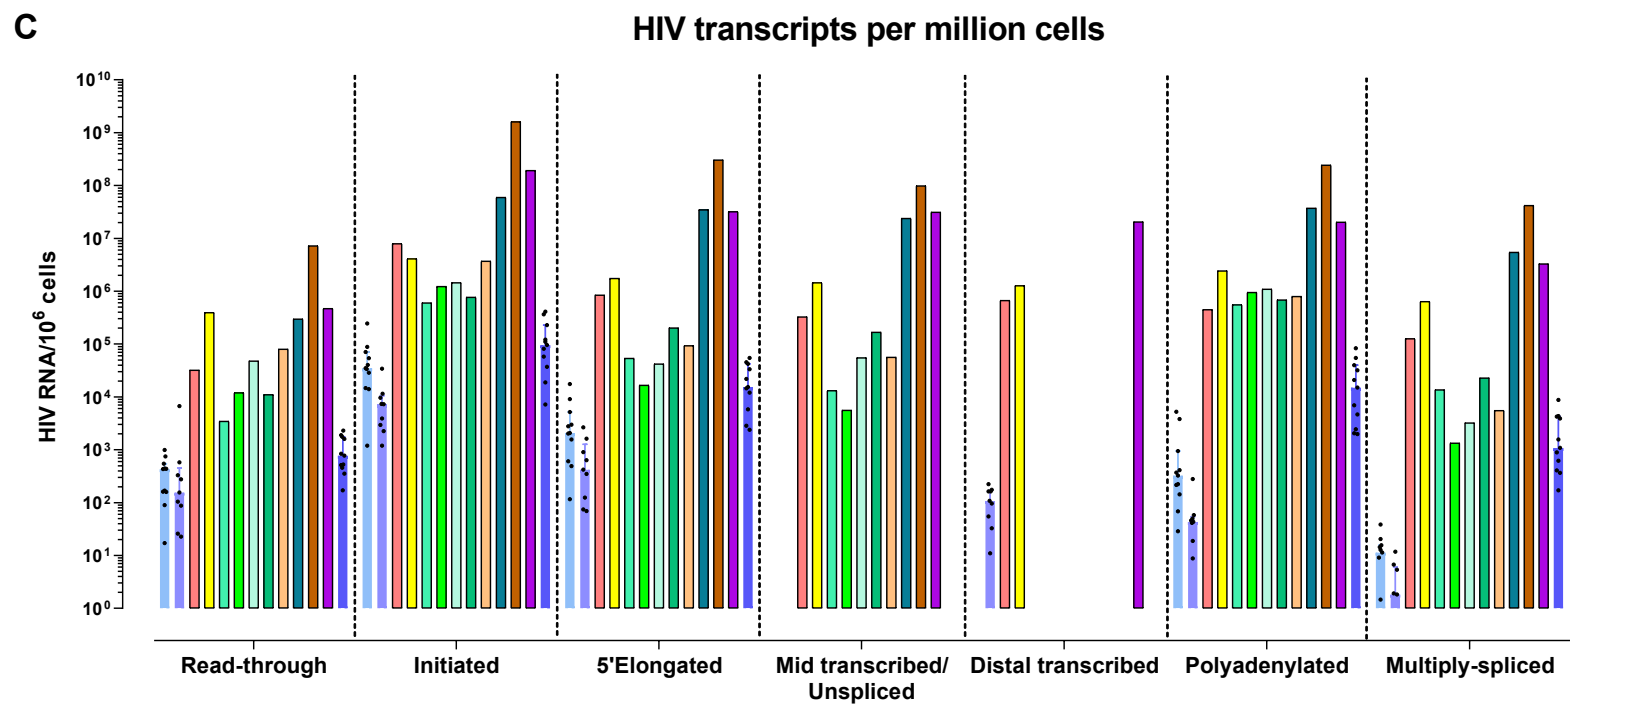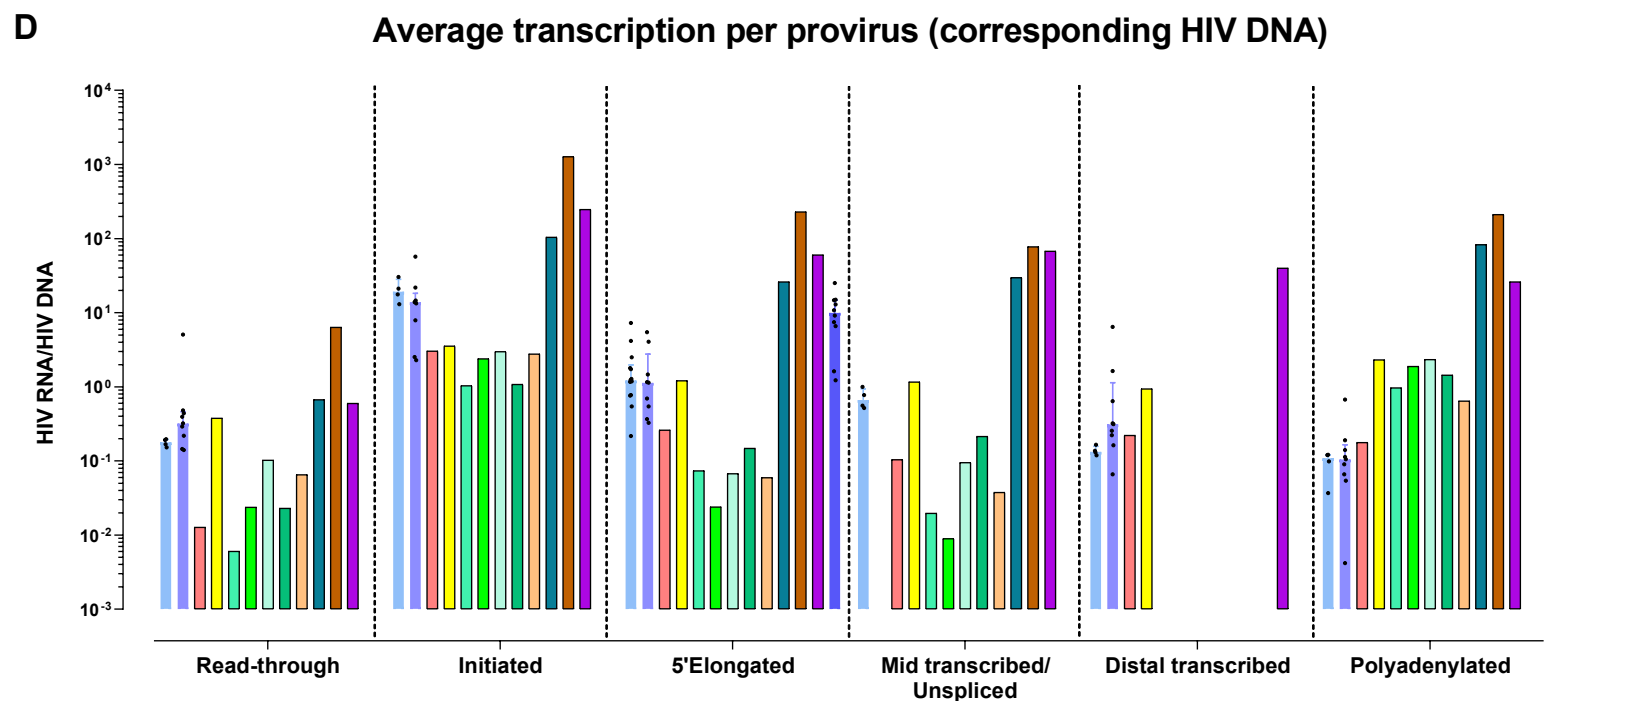

Supplement: 12977_2019_494_MOESM1_ESM.pdf [file 12977_2019_494_MOESM1_ESM.pdf]
