# Supplementary material for: Heterogeneity in HIV and cellular transcription profiles in cell line models of latent and productive infection: implications for HIV latency
Source: PubMed Central journal article supplement (PMC6849327; doi:10.1186/s12977-019-0494-x), 2019-11-11

# Untreated vs. activated J-Lat 9.2 cells

● NS ● Log2 FC ● P ● P & Log2 FC

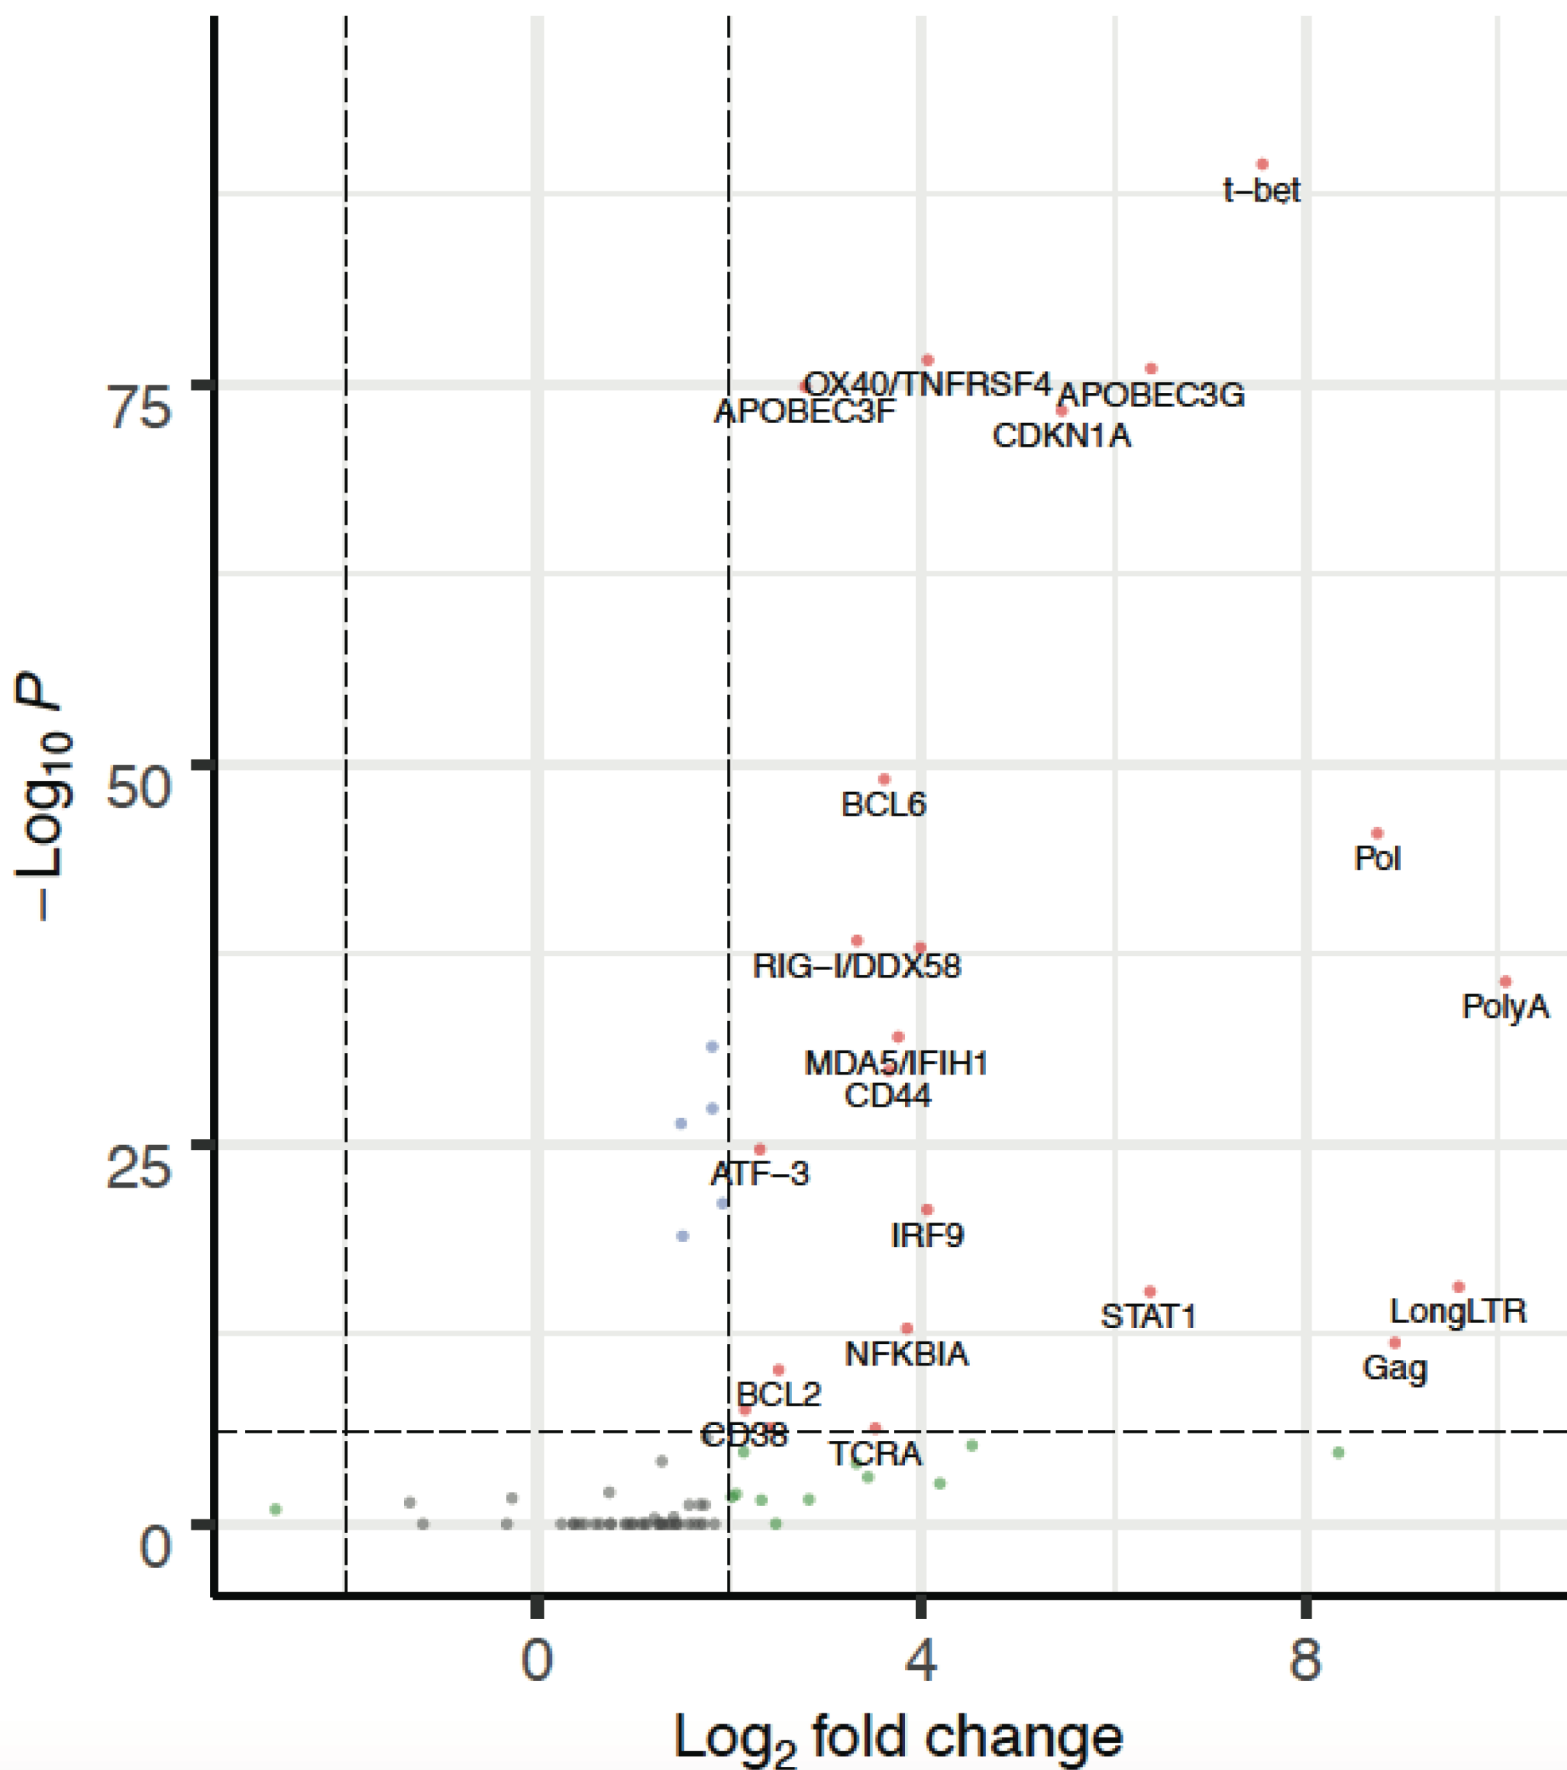

Supplement: 12977_2019_494_MOESM13_ESM.pdf [file 12977_2019_494_MOESM13_ESM.pdf]
